# Supplementary material
Source: PubMed Central journal article supplement (PMC10284029)

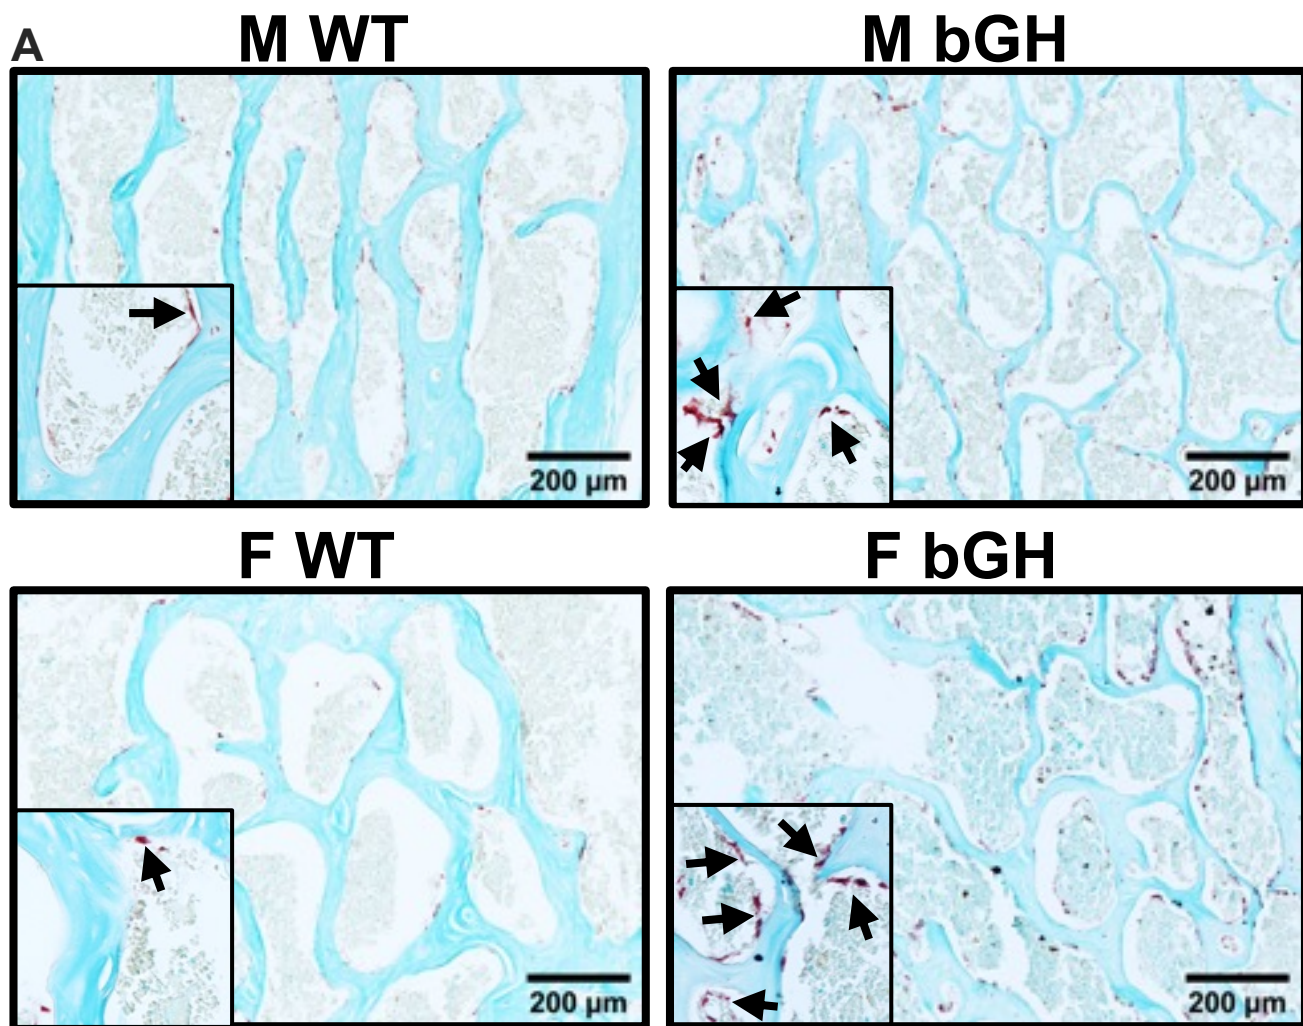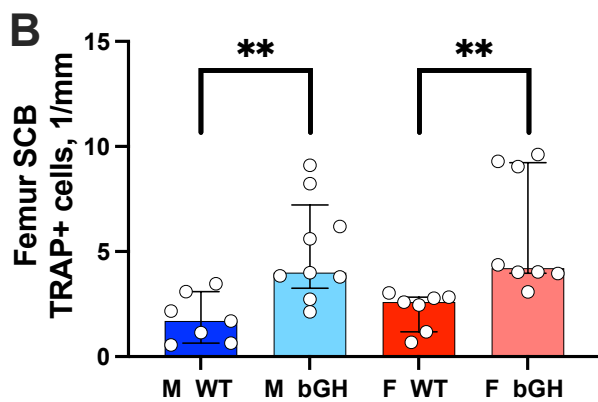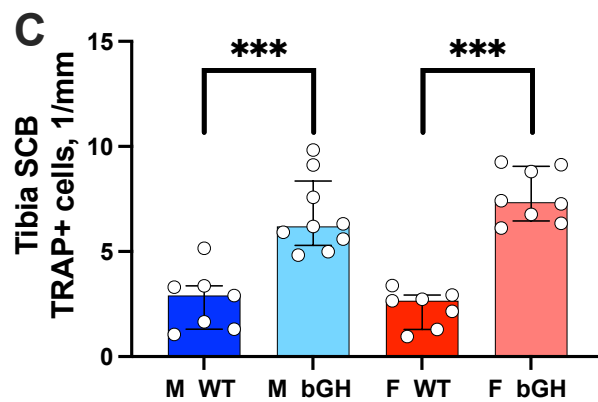

Supplement: mmc1.pdf [file mmc1.pdf]

# Supplement figure 2

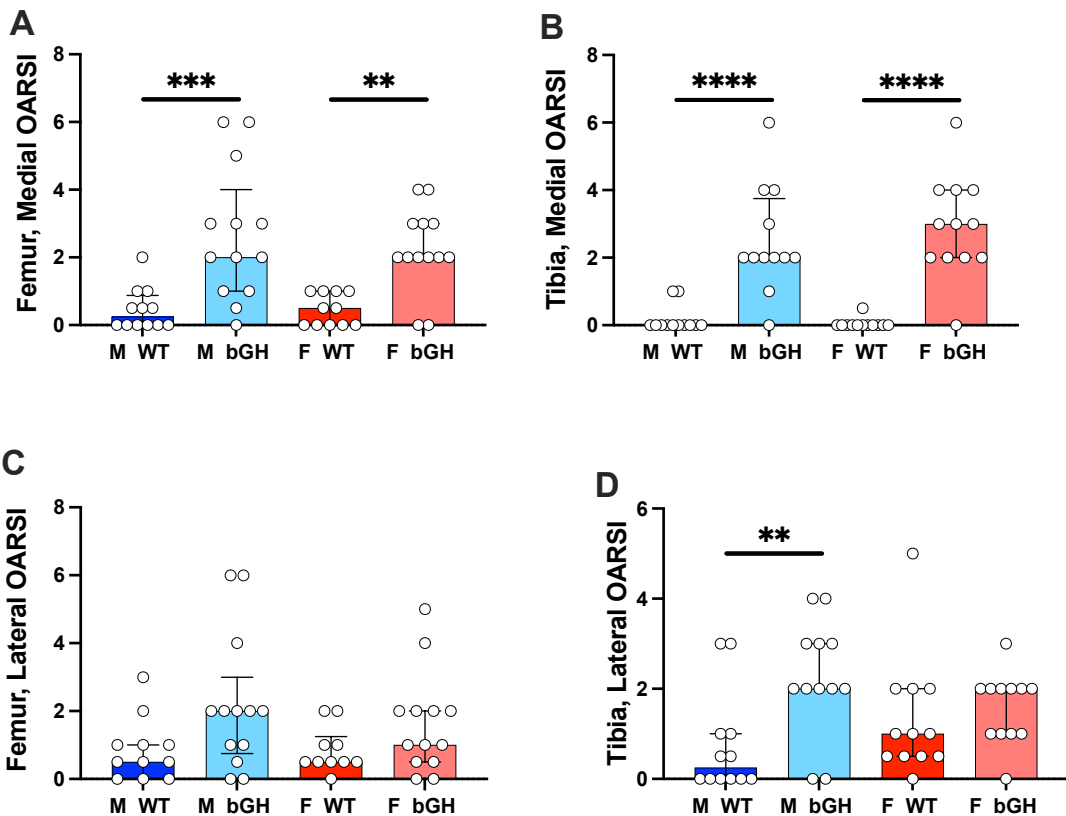

Supplement: mmc2.pdf [file mmc2.pdf]

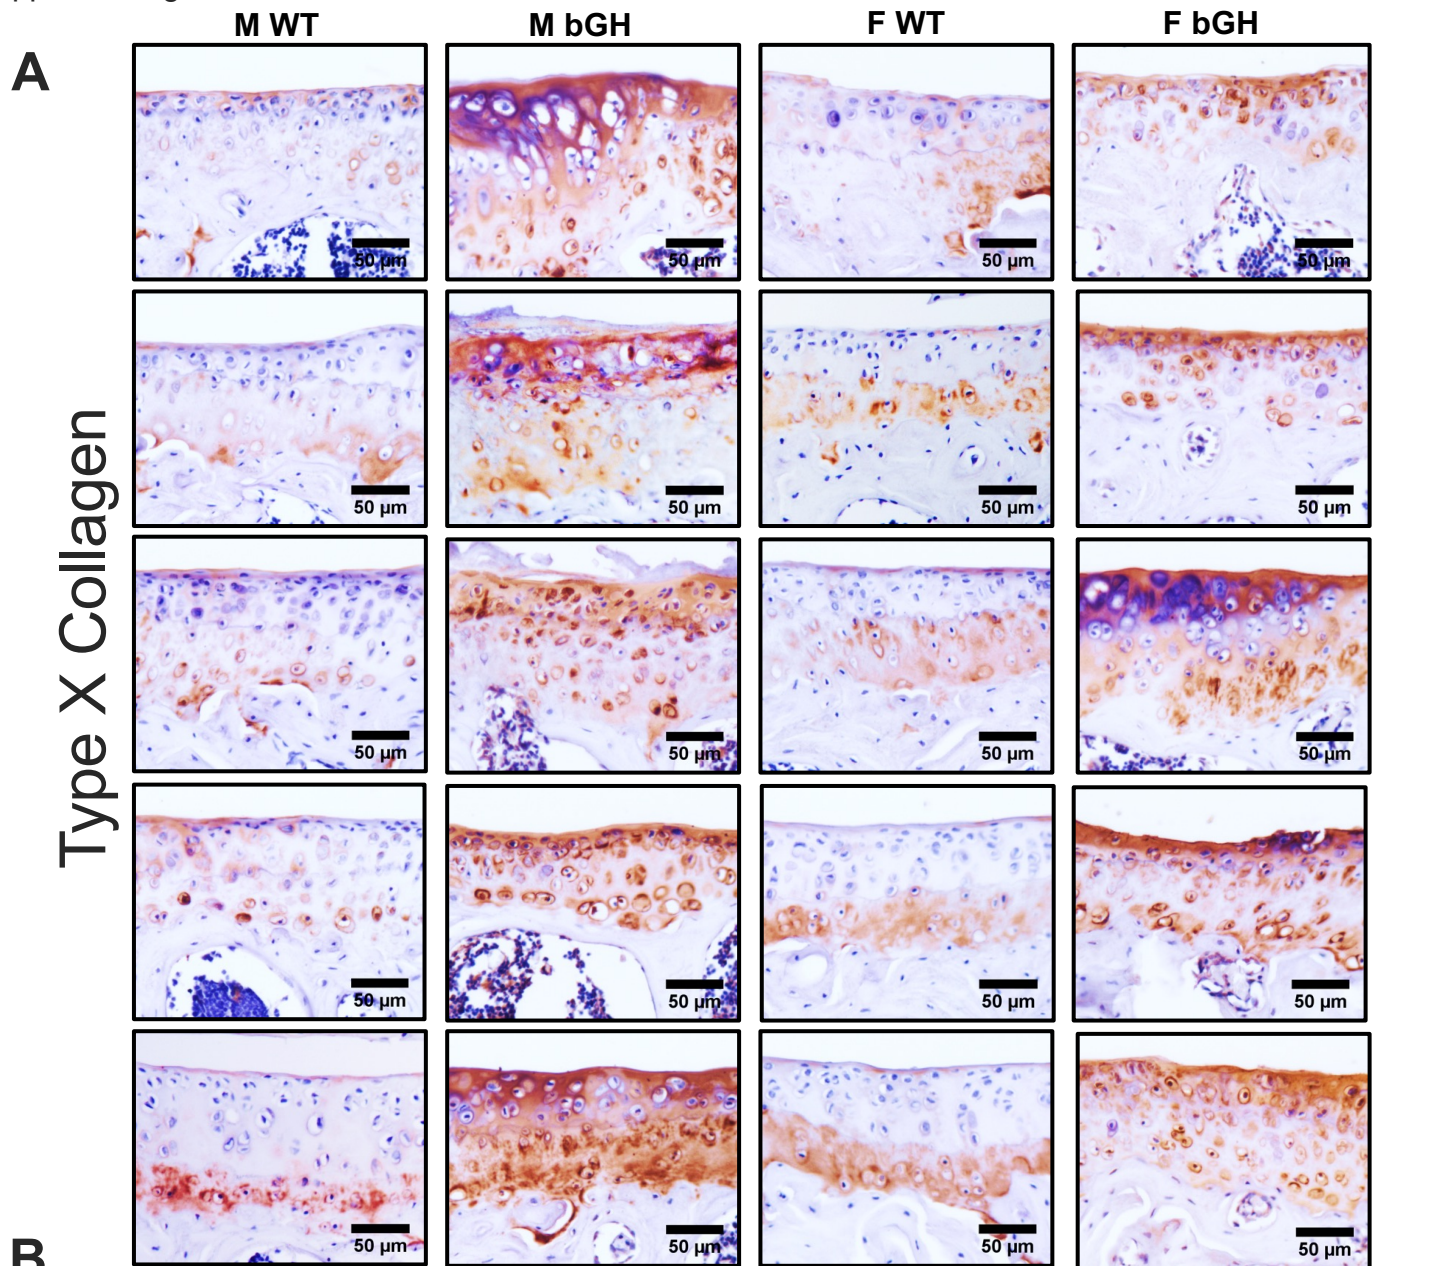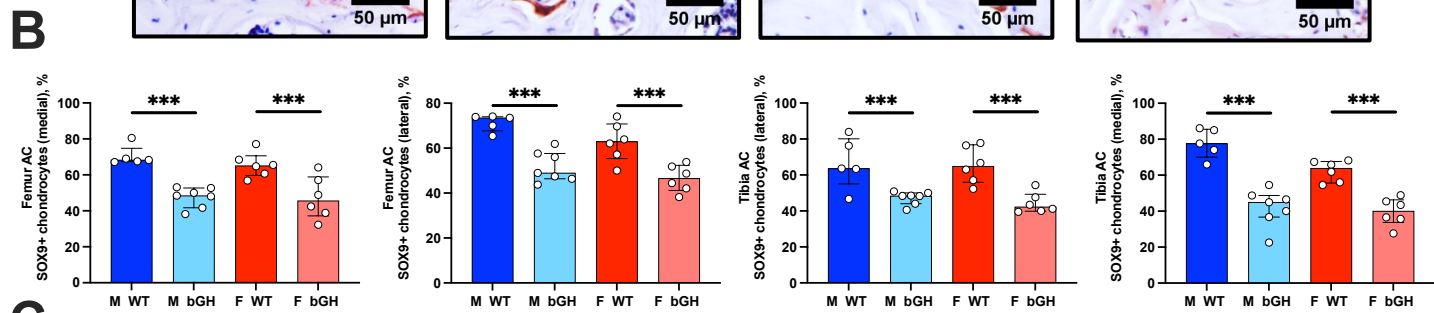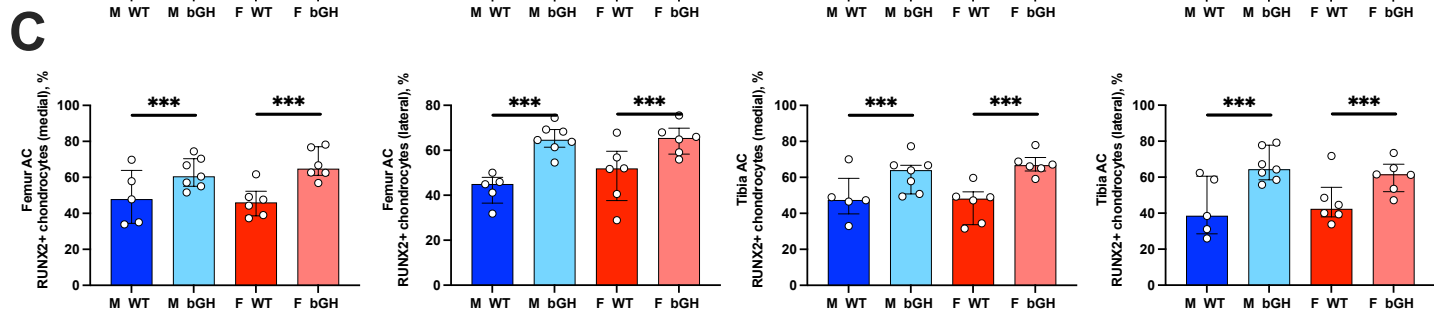

Supplement: mmc3.pdf [file mmc3.pdf]

# Supplement figure 5

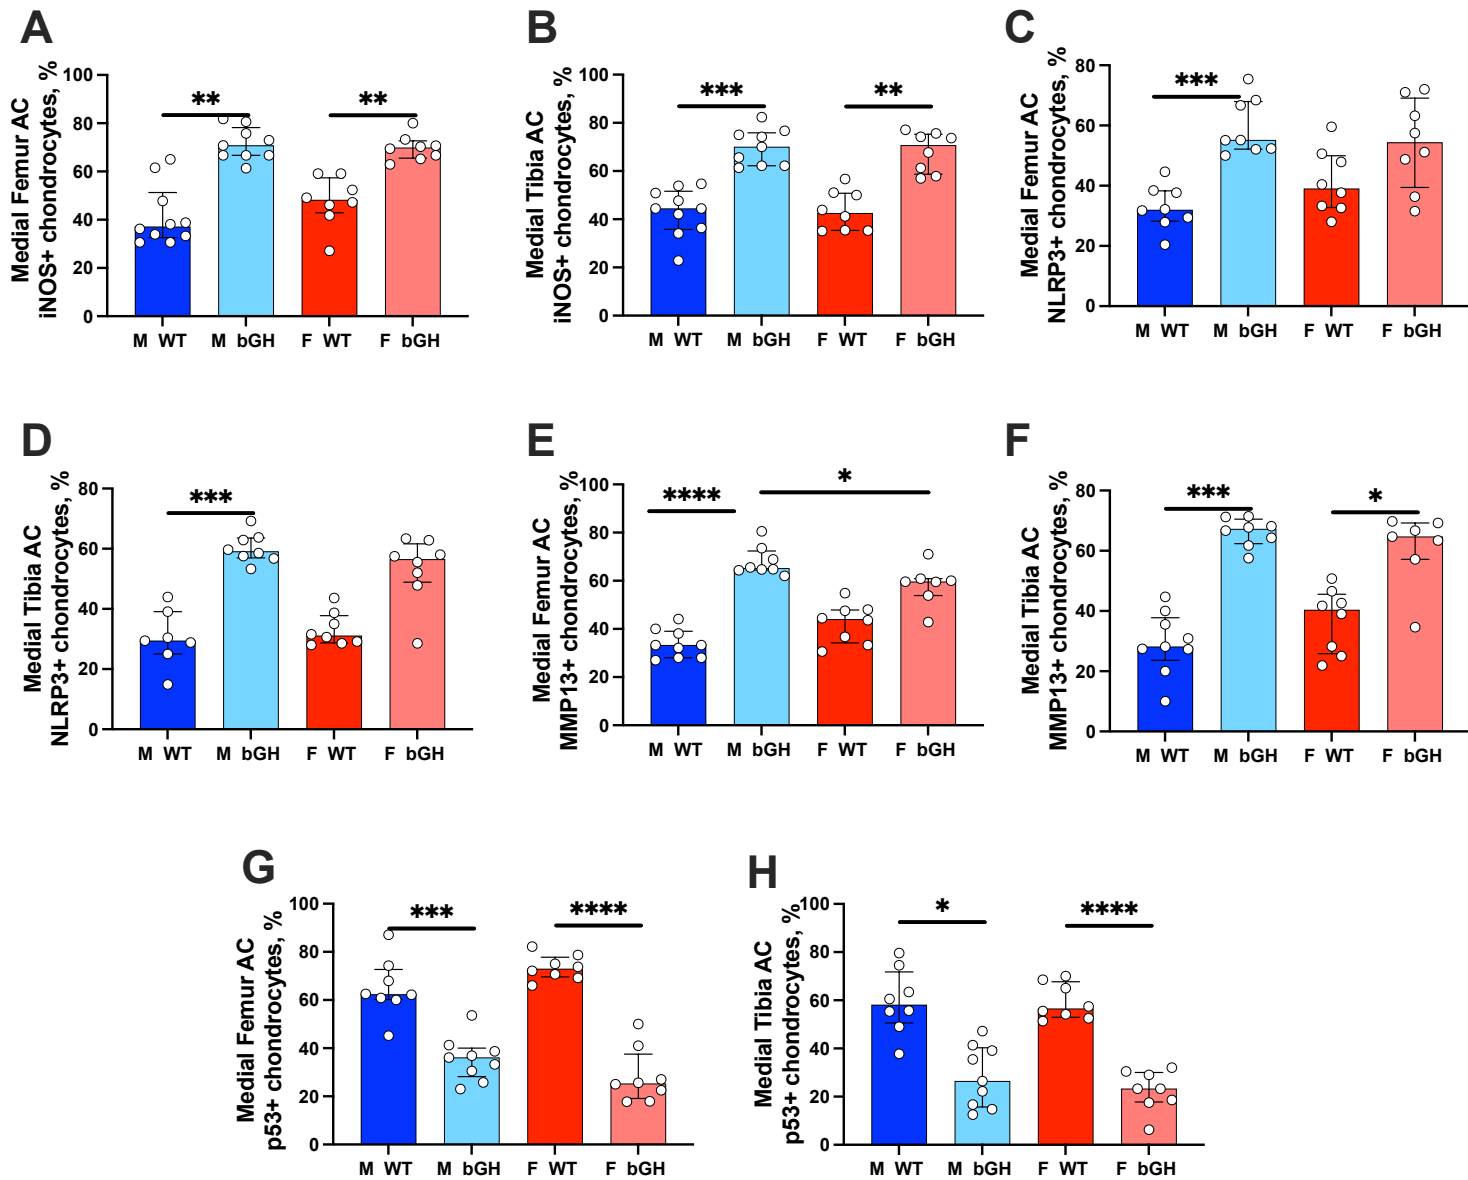

Supplement: mmc5.pdf [file mmc5.pdf]

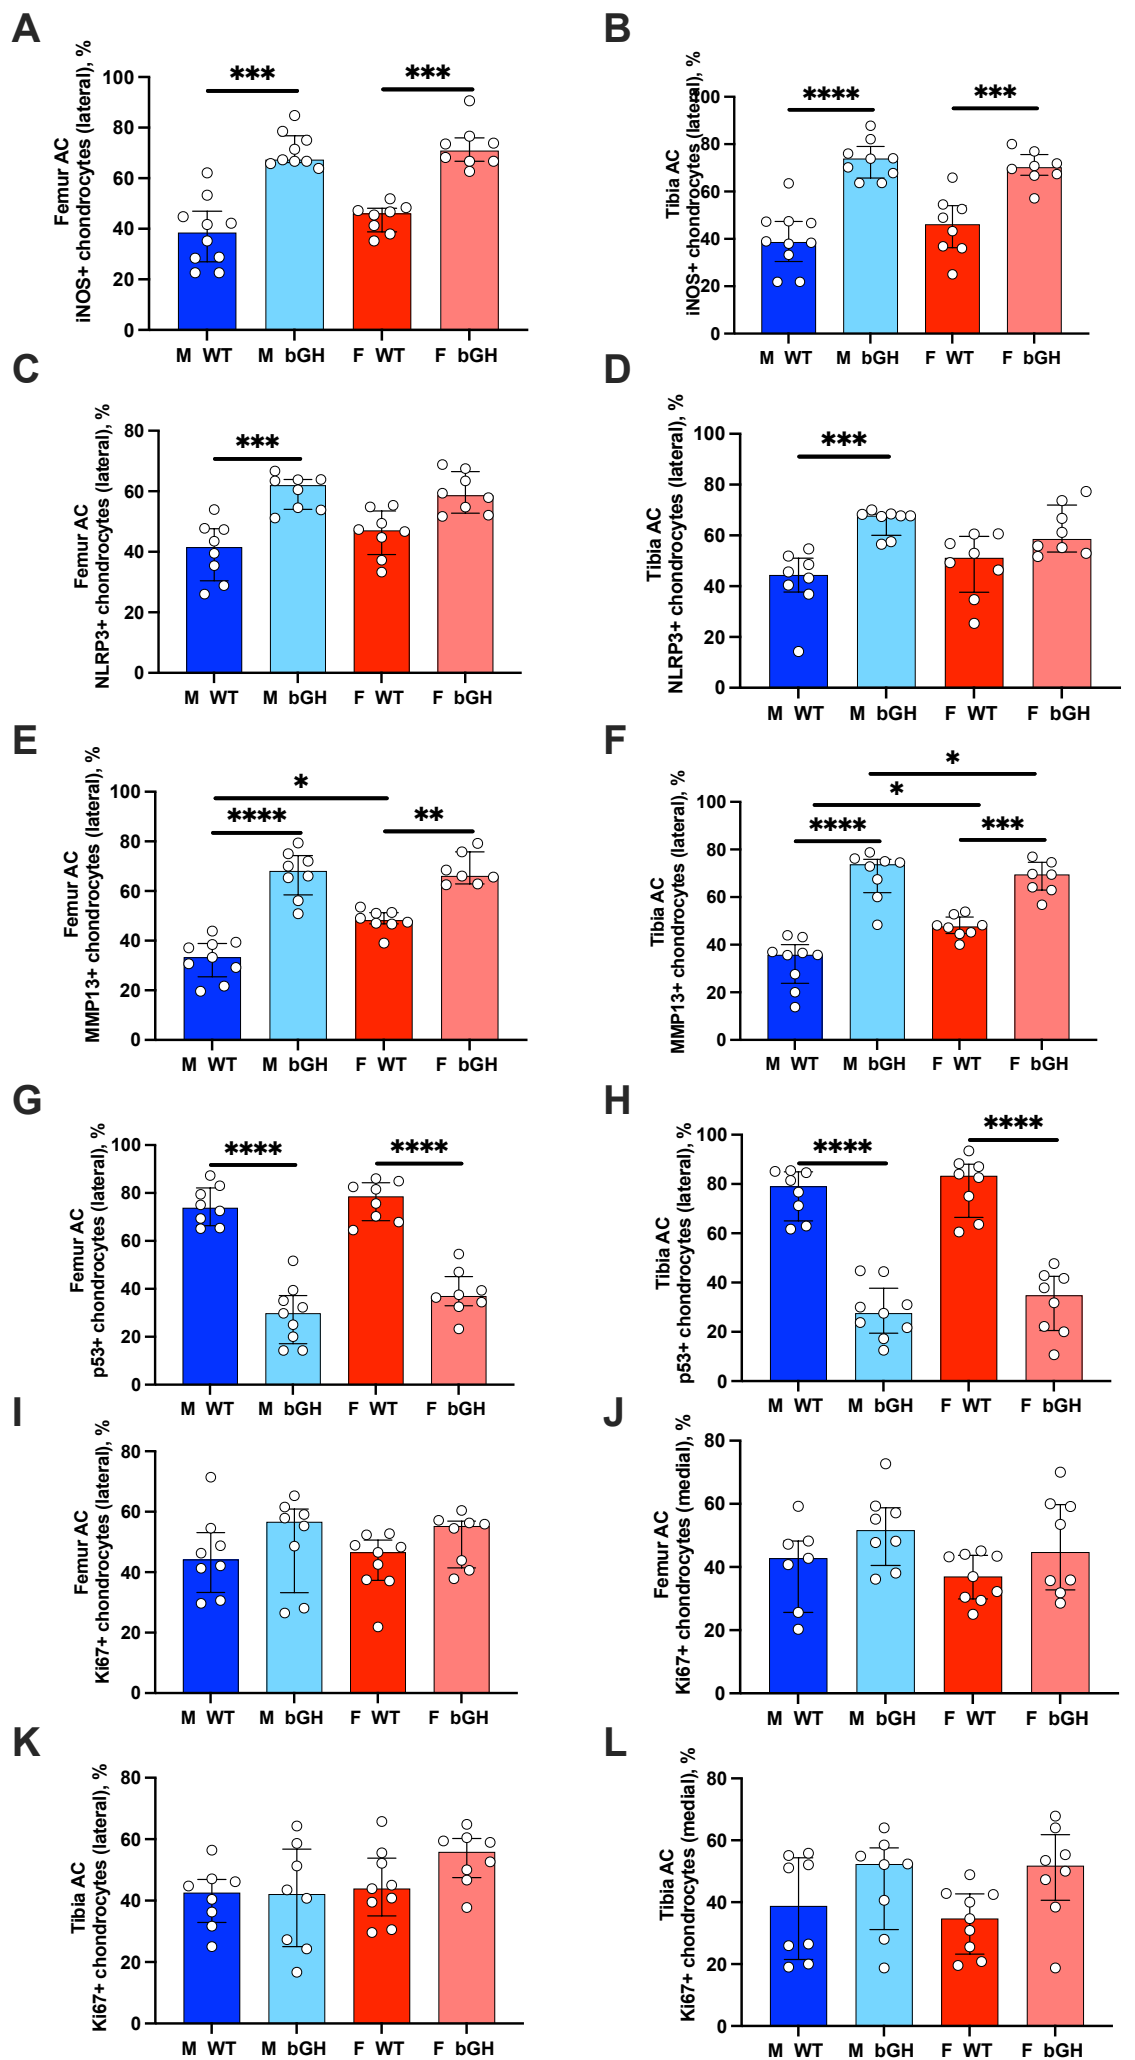

Supplement: mmc6.pdf [file mmc6.pdf]

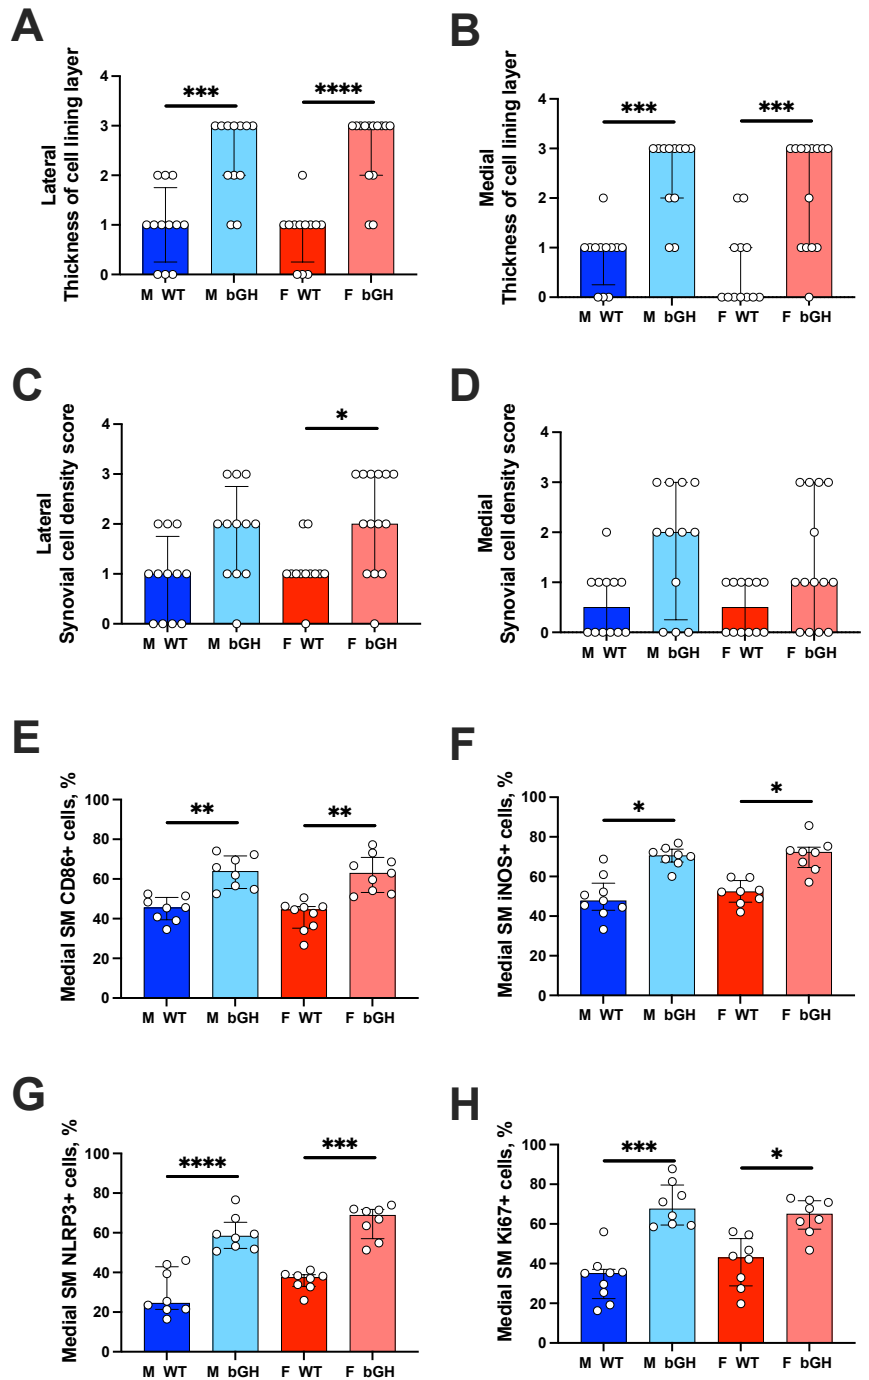

Supplement: mmc7.pdf [file mmc7.pdf]

**A**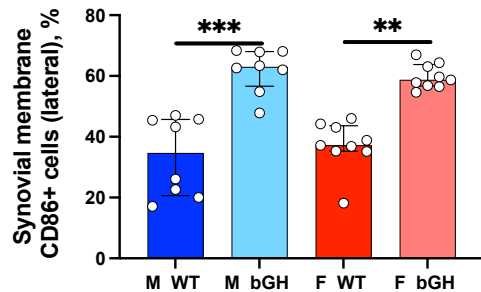**B**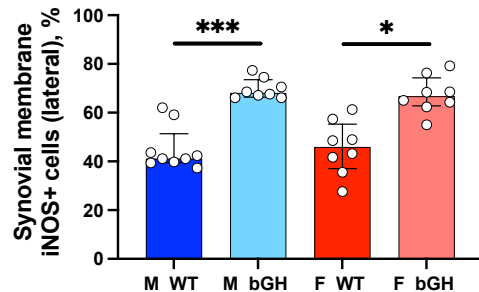**C**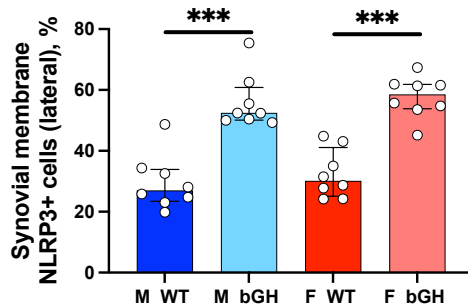**D**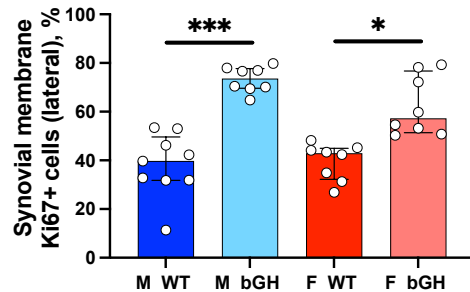

Supplement: mmc8.pdf [file mmc8.pdf]
